# Supplementary material
Source: Springer Nature journal article supplement (https://www.springermedizin.de/resource/supplementary/13256_2010_1544_MOESM3_ESM.pdf/9647900)

IMAGE 58

SER 1-4

MF 1.73

D1 1 2.2 cm

D1 2 1.8 cm

R

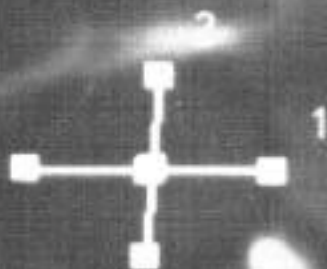

me2d\_5u 30

D

TR 746.0

TE 25.8/1

SP 8

SL

FoV 203\*

192 \*25

Tra

Supplement: MOESM3 [file 9647900]
